# Supplementary material for: Impact of fluorine-induced effects on co-sensitization systems in dye-sensitized solar cells
Source: Royal Society of Chemistry journal article supplement (doi:10.1039/d4cp04789c), 2025-01-01
Supplement: d4cp04789c2.pdf [file d4cp04789c2.pdf]

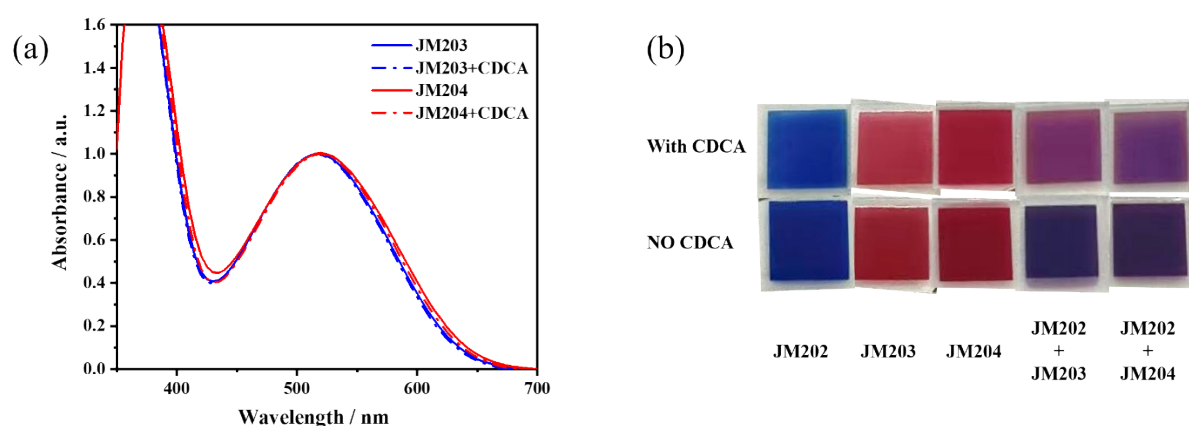

**Figure S1.** (a) UV-vis absorption spectra of sensitizers JM203/JM203+CDCA and JM204/JM204+CDCA attached on 4 μm TiO<sub>2</sub> film immersed in CH<sub>3</sub>CN solutions with 0.1 M LiClO<sub>4</sub>. (b) Photograph of dye adsorption on 6 μm TiO<sub>2</sub>.

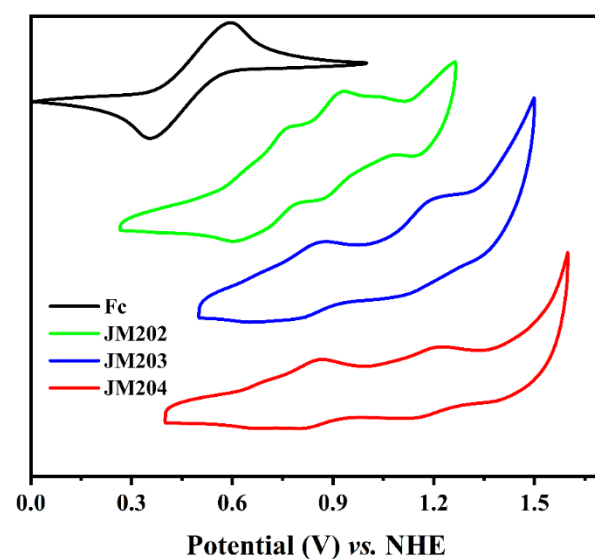

**Figure S2.** Cyclic voltammograms of JM202, JM203 and JM204 sensitizers

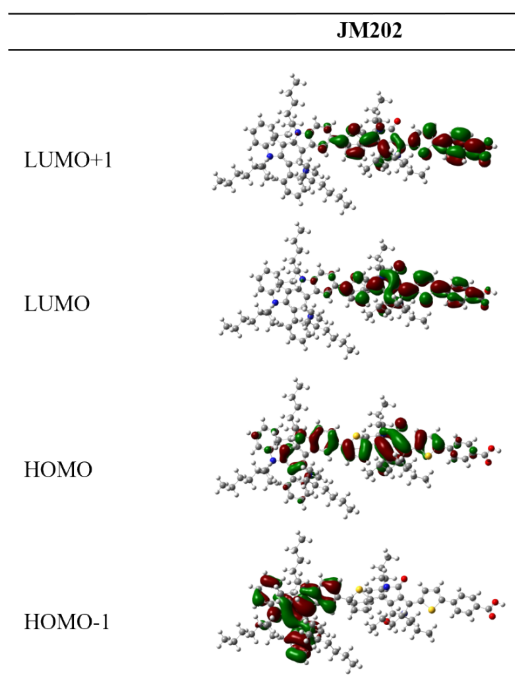

**Figure S3.** The electron distribution in HOMO, HOMO-1 and LUMO, LUMO+1 levels of JM202 by DFT calculations..

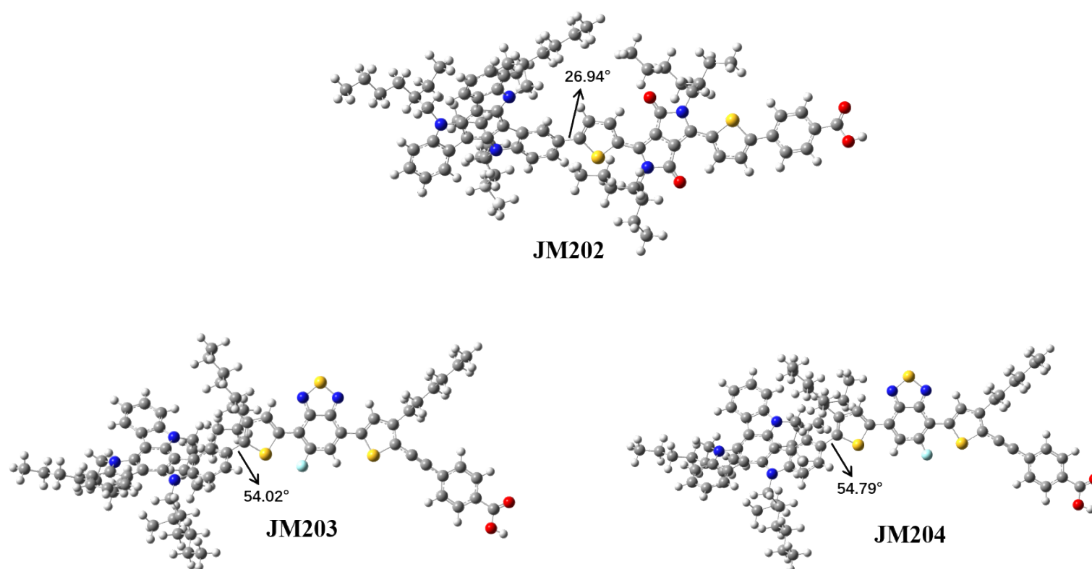

**Figure S4.** Dihedral angles between the neighboring units calculated from optimized structures.

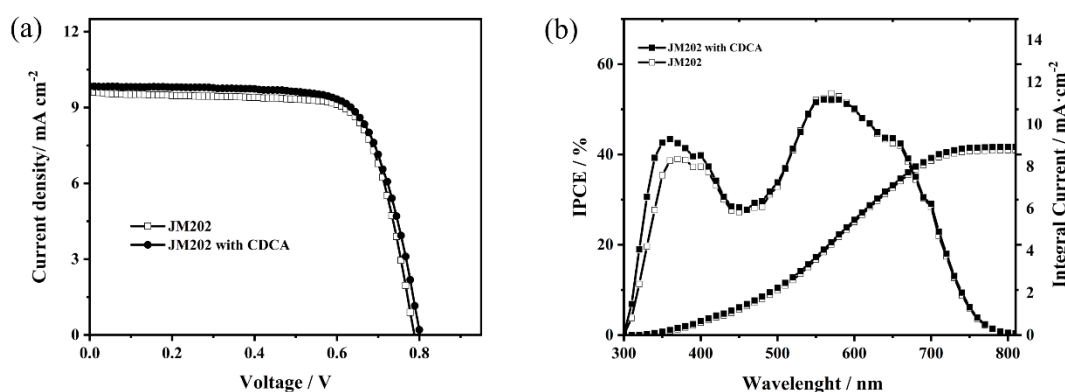

**Figure S5.** (a) Current–voltage (J–V) characteristics of the DSSCs measured under simulated AM1.5G. (b) IPCE spectra and integrated photocurrents of the DSSCs based on JM202.

**Table S1.** Photophysical and electrochemical properties of sensitizers on DFT calculations

| Dye          | $E_{0-0}^{\text{DFT[a]}}$<br>(eV) | $E_{\text{H-1}}^{\text{DFT[b]}}$<br>(eV) | $E_{\text{H}}^{\text{DFT[b]}}$<br>(eV) | $E_{\text{L}}^{\text{DFT[b]}}$<br>(eV) | $E_{\text{L+1}}^{\text{DFT[b]}}$<br>(eV) |
|--------------|-----------------------------------|------------------------------------------|----------------------------------------|----------------------------------------|------------------------------------------|
| <b>JM202</b> | 2.14                              | -5.24                                    | -4.98                                  | -2.84                                  | -1.90                                    |
| <b>JM203</b> | 2.07                              | -5.14                                    | -5.07                                  | -3.00                                  | -2.16                                    |
| <b>JM204</b> | 2.18                              | -5.21                                    | -5.14                                  | -2.96                                  | -2.08                                    |

[a] Energy gaps ( $E_{0-0}^{\text{DFT}}$ ), [b]H, H-1 and L, L+1 represent HOMO, HOMO-1 and LUMO, LUMO+1 respectively. The frontier orbital energy levels ( $E_{\text{H}}^{\text{DFT}}$  and  $E_{\text{L}}^{\text{DFT}}$ ) with respect to vacuum are calculated at the B3LYP/6-311G(d,p) level of theory for dye in vacuum,  $\lambda_{\text{abs max}}^{\text{DFT}}$  is derived from DFT calculation at the B3LYP/6-311G(d,p) level of theory for dye in vacuum, Energy gaps (DFT) are calculated via  $E_{0-0}^{\text{DFT}} = E_{\text{L}}^{\text{DFT}} - E_{\text{H}}^{\text{DFT}}$ .

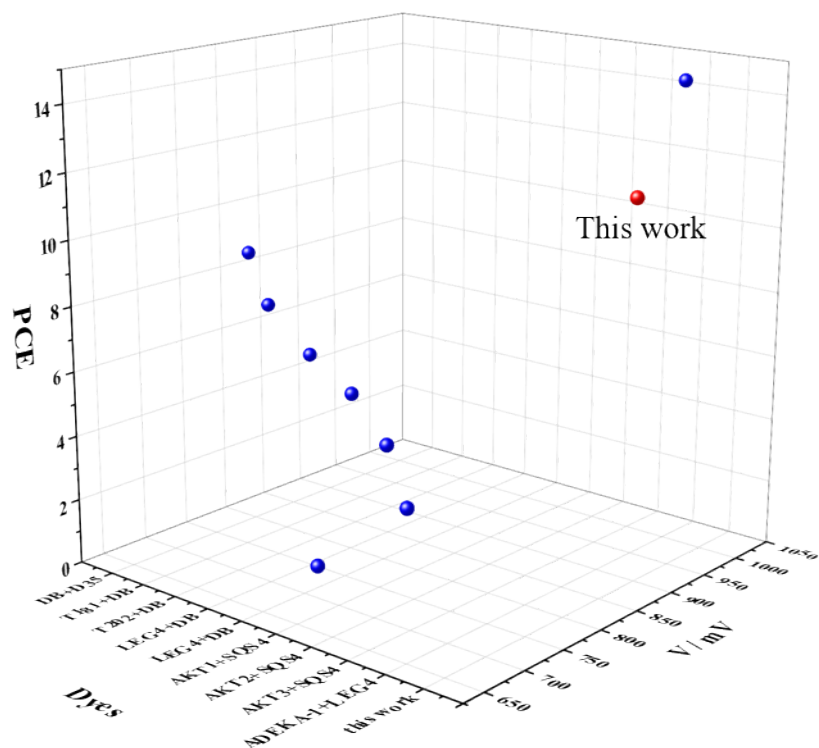

**Figure S6.** Comparison of reported and current work on cobalt electrolyte-based pure organic photosensitizers for co-sensitization.

**Table S2.** Optimization data of DSSCs devices based on JM202-JM204 and co-sensitization under different conditions.

| Dye                                | Electrolyte                              | $V_{oc}$<br>(V) | $J_{sc}$<br>(mA cm <sup>-2</sup> ) | $FF$<br>(%) | $PCE$<br>(%) |
|------------------------------------|------------------------------------------|-----------------|------------------------------------|-------------|--------------|
| <b>JM202</b>                       | [Cu(tmby) <sub>2</sub> ] <sup>2+/+</sup> | 0.82            | 8.61                               | 70.76       | 5.0          |
| <b>JM203</b>                       | [Cu(tmby) <sub>2</sub> ] <sup>2+/+</sup> | 0.96            | 5.19                               | 75.91       | 3.8          |
| <b>JM204</b>                       | [Cu(tmby) <sub>2</sub> ] <sup>2+/+</sup> | 0.99            | 8.57                               | 75.00       | 6.3          |
| <b>JM202:JM203</b><br>(60 μM:40μM) | [Co(bpy) <sub>3</sub> ] <sup>3+/2+</sup> | 0.82            | 13.04                              | 68.81       | 7.4          |
| <b>JM202:JM203</b><br>(50 μM:50μM) | [Co(bpy) <sub>3</sub> ] <sup>3+/2+</sup> | 0.83            | 14.93                              | 67.63       | 8.5          |
| <b>JM202:JM203</b><br>(40 μM:60μM) | [Co(bpy) <sub>3</sub> ] <sup>3+/2+</sup> | 0.84            | 13.95                              | 66.58       | 7.8          |
| <b>JM202:JM204</b><br>(60 μM:40μM) | [Co(bpy) <sub>3</sub> ] <sup>3+/2+</sup> | 0.86            | 17.88                              | 69.15       | 10.7         |
| <b>JM202:JM204</b><br>(50 μM:50μM) | [Co(bpy) <sub>3</sub> ] <sup>3+/2+</sup> | 0.89            | 20.38                              | 64.24       | 11.7         |
| <b>JM202:JM204</b><br>(40 μM:60μM) | [Co(bpy) <sub>3</sub> ] <sup>3+/2+</sup> | 0.89            | 18.39                              | 66.08       | 10.8         |

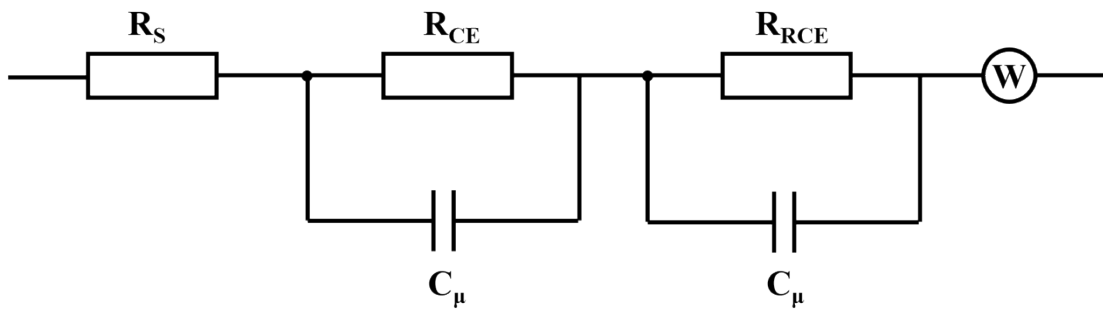

**Figure S7.** Equivalent circuit for EIS data fitting.

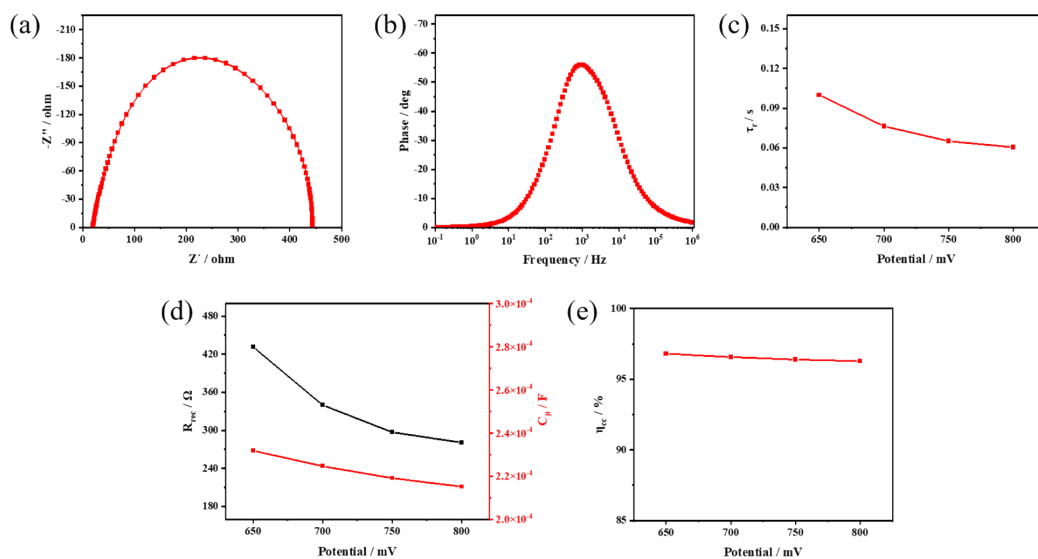

**Figure S8.** Nyquist plots (a) and bode plots (b) of DSSCs based on JM202. (d) interfacial charge-recombination resistance ( $R_{rec}$ ), and chemical capacitance ( $C_\mu$ ), (e) electron lifetime ( $\tau_r$ ), (f) Charge-collection efficiency ( $\eta_{cc}$ ) fitted from impedance analysis under a series applied bias for DSSCs based on dye JM202.
